# Supplementary material
Source: publisher figshare collection journal article supplement (https://frontiersin.figshare.com/ndownloader/files/23724626)
Supplement: Supplementary file 1 [file 23724626]

Supplementary Material

**Supplementary Table 3.** Results of the univariate ANOVA for various morphometric measurements and truss distances of different Hilsa shad population.

| Morphometric measurement | Wilks’ Lambda | F | Significance | Morphometric measurement | Wilks’ Lambda | F | Significance |
| --- | --- | --- | --- | --- | --- | --- | --- |
| D1-2 | 0.73 | 14.32 | 0.000*** | D4-7 | 0.66 | 19.42 | 0.000*** |
| D1-10 | 0.82 | 8.64 | 0.000*** | D4-8 | 0.54 | 32.66 | 0.000*** |
| D2-3 | 0.69 | 17.60 | 0.000*** | D4-9 | 0.53 | 33.83 | 0.000*** |
| D2-9 | 0.60 | 25.72 | 0.000*** | D5-6 | 0.44 | 49.57 | 0.000*** |
| D2-10 | 0.52 | 35.59 | 0.000*** | D5-7 | 0.62 | 24.02 | 0.000*** |
| D3-4 | 0.61 | 24.17 | 0.000*** | D5-11 | 0.56 | 30.42 | 0.000*** |
| D3-8 | 0.64 | 21.21 | 0.000*** | D6-12 | 0.76 | 12.36 | 0.000*** |
| D3-9 | 0.49 | 39.59 | 0.000*** | D6-7 | 0.69 | 17.57 | 0.000*** |
| D3-10 | 0.64 | 21.88 | 0.000*** | D7-8 | 0.72 | 14.67 | 0.000*** |
| D4-5 | 0.83 | 8.06 | 0.000*** | D8-9 | 0.71 | 15.56 | 0.000*** |
| D4-6 | 0.71 | 15.86 | 0.000*** | D9-10 | 0.90 | 4.44 | 0.001** |
